# Supplementary material for: Pond Assay for the Sensory Systems of Caenorhabditis elegans: A Novel Anesthesia-Free Method Enabling Detection of Responses to Extremely Low Chemical Concentrations
Source: MDPI journal article supplement (doi:10.3390/biology11020335), 2022-02-21
Supplement: s1 [file s1]

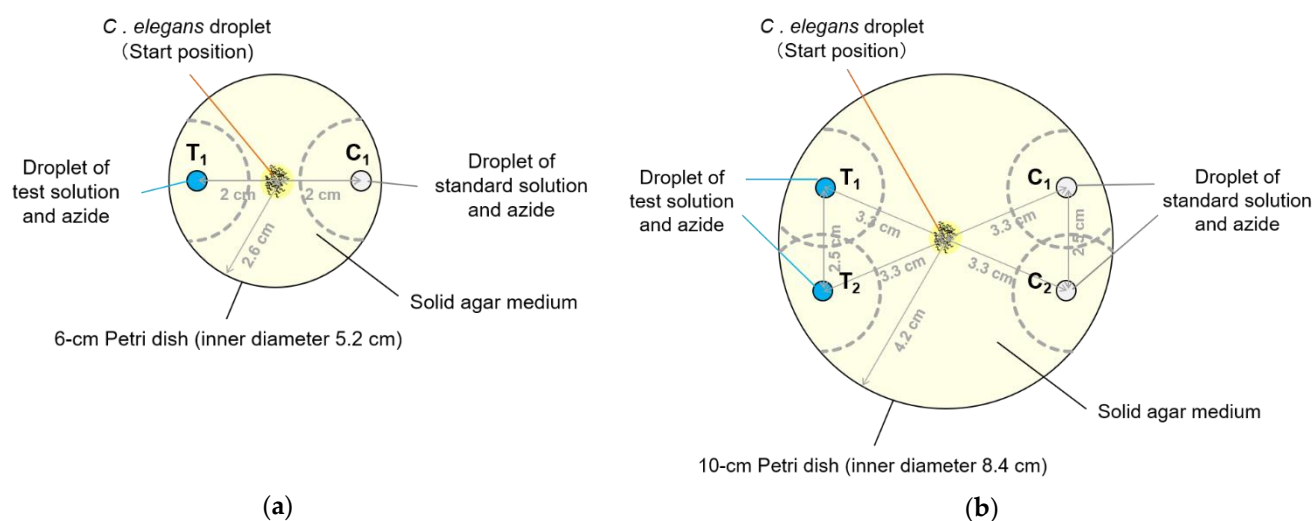

**Figure S1.** Schematic of conventional plates described in section 2.2. **(a)** A ø6-cm plate in which test solution and standard (control) solution were spotted on T<sub>1</sub> and C<sub>1</sub>, respectively. **(b)** A ø10-cm plate in which test solution was spotted on T<sub>1</sub> and T<sub>2</sub> and standard solution was spotted on C<sub>1</sub> and C<sub>2</sub>.

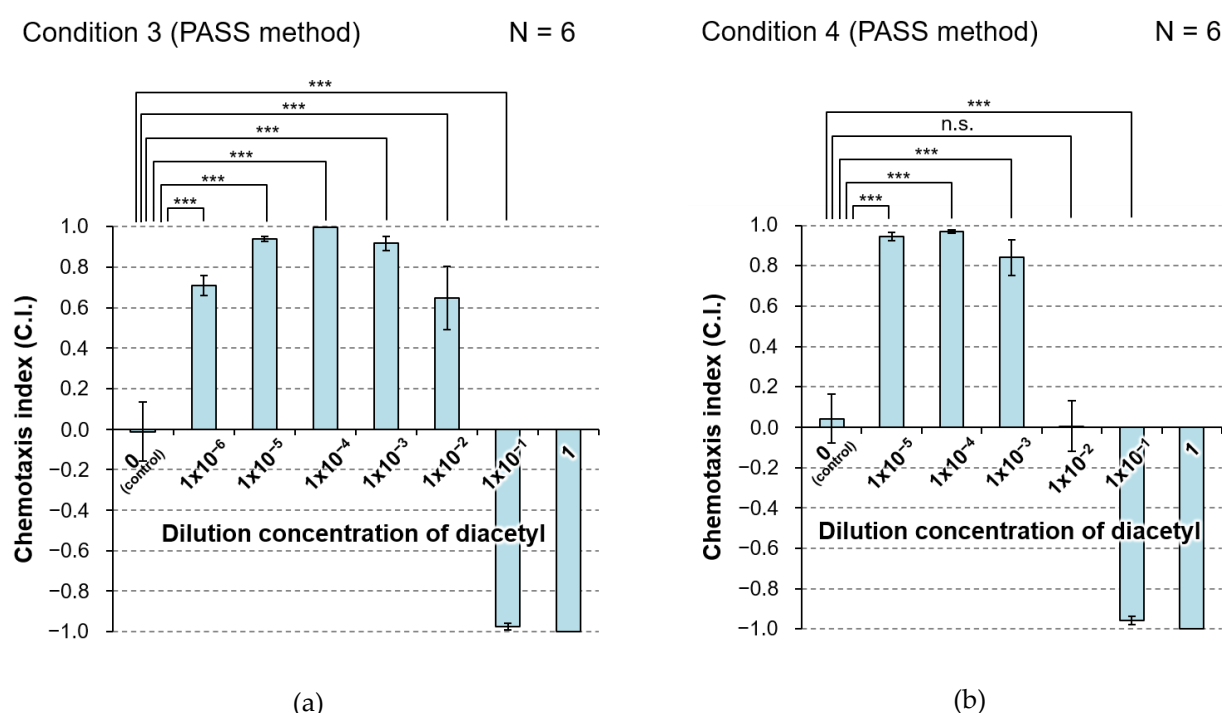

**Figure S2.** Result of PASS to evaluate chemotaxis of *C. elegans* to a graded series of concentrations of diacetyl. **(a)** Result of PASS under condition 3 in Table 1. **(b)** Result of PASS under condition 4 in Table 1. The maximum concentration of diacetyl was 1 (undiluted solution) and the minimum diluted concentration was  $1 \times 10^{-6}$  for **a** or  $1 \times 10^{-5}$  for **b**. Light-blue bar and error bar represent the mean and SEM of chemotaxis index (C.I.) of six independent assays under the same condition. All data were analyzed by one-way ANOVA at  $p < 0.05$ ,  $p < 0.01$ , and  $p < 0.001$  (\*\*\*) significance levels by comparison to the control group. Note that the data of the undiluted solution with no variance were excluded from the analysis. n.s., not significant; N, the number of assays. The details of the  $p$ -values are shown in Table S1.

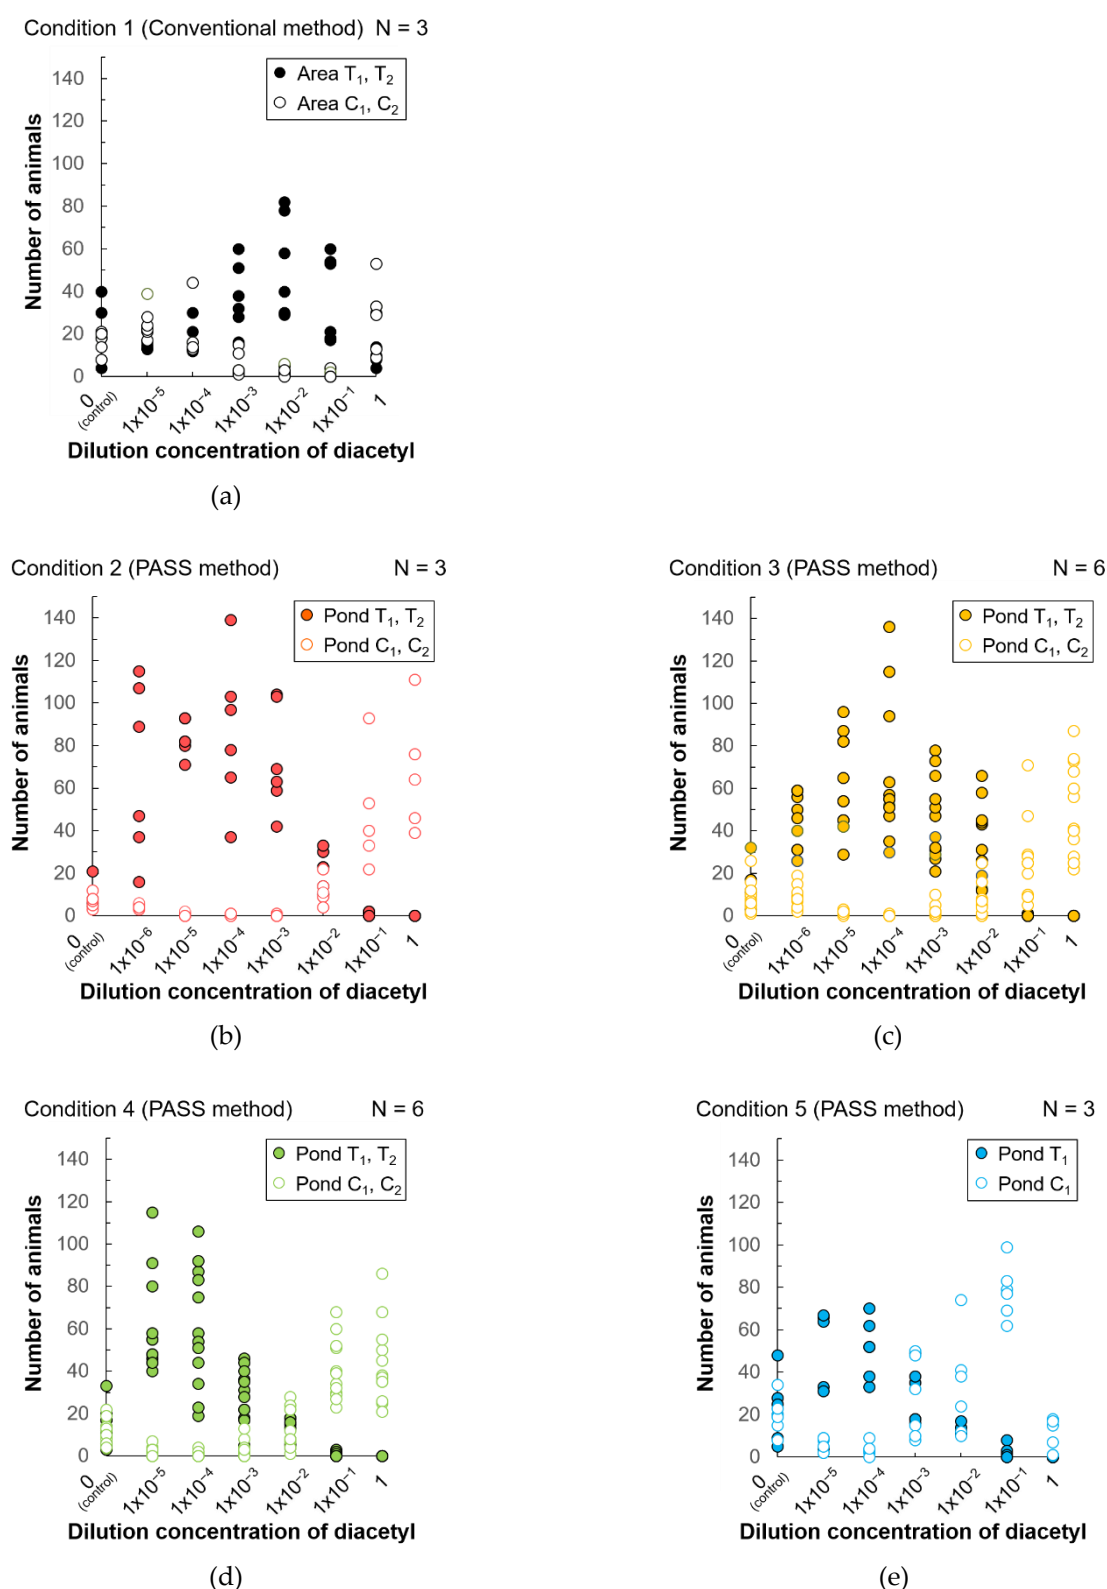

**Figure S3.** Number of *C. elegans* individuals trapped in the test area/ponds and control area/ponds in chemotaxis assays of diacetyl. (a) Result of conventional chemotaxis assay under condition 1 corresponding to Figure 5. (b) Result of PASS under condition 2 corresponding to Figure 6a. (c) Result of PASS under condition 3 corresponding to Figures 6b and S2a. (d) Result of PASS under condition 4 corresponding to Figures 6c and S2b. (e) Result of PASS under condition 5 corresponding to Figure 6d. Closed circle represents the number of animals trapped in the area/ponds of the test side, T<sub>1</sub> and T<sub>2</sub>, and open circle represents the number of animals trapped in the area/ponds of the control side, C<sub>1</sub> and C<sub>2</sub> at each of three or six independent assays. N, the number of assays.

**Table S1.** The *p*-values from comparisons between the control group and each dilution group for the results shown in Figures 5, 6, and S2.

| Dilution<br>Figure |   | $1 \times 10^{-6}$ | $1 \times 10^{-5}$ | $1 \times 10^{-4}$ | $1 \times 10^{-3}$ | $1 \times 10^{-2}$ | $1 \times 10^{-1}$ | 1              |
|--------------------|---|--------------------|--------------------|--------------------|--------------------|--------------------|--------------------|----------------|
| Figure 5           |   |                    | 0.1933             | 0.7336             | 0.0051             | 0.0006             | 0.0004             | 0.1028         |
| Figure 6           | a | < 0.000001         | < 0.0000001        | < 0.0000001        | < 0.0000001        | 0.0063             | < 0.0000001        | Not applicable |
|                    | b | 0.0004             | < 0.0001           | < 0.0001           | < 0.0001           | 0.0003             | < 0.0001           | Not applicable |
|                    | c |                    | < 0.0001           | < 0.0001           | 0.0002             | 0.8512             | < 0.0001           | Not applicable |
|                    | d |                    | 0.0031             | 0.0012             | 0.6585             | 0.1767             | 0.0010             | Not applicable |
| Figure S2          | a | < 0.000001         | < 0.00000001       | < 0.000000001      | < 0.00000001       | < 0.00001          | < 0.00000001       | Not applicable |
|                    | b |                    | < 0.00000001       | < 0.00000001       | < 0.0000001        | 0.7515             | < 0.00000001       | Not applicable |
